# Supplementary material
Source: PubMed Central journal article supplement (PMC4530761)
Supplement: SD7.pdf [file SD7.pdf]

SUPPLEMENTAL TABLE 1  
Annual variation of the *Anopheles gambiae* LF transmission level over the six MDA rounds

| Years  | Number of mosquito collected | Number of mosquito dissected | HBR    | Infection rate  | Infectivity rate (L3 pos) | EIR  | ATP  |
|--------|------------------------------|------------------------------|--------|-----------------|---------------------------|------|------|
|        |                              |                              |        | % (positive/N)  | % (positive/N)            |      |      |
| Before | 20957                        | 16230                        | 545.8  | 4 (646/16230)   | 2.3 (372/16230)           | 12.6 | 75.3 |
| MDA 1  | 11190                        | 11190                        | 291.4  | 4.5 (505/11190) | 1.3 (141/11190)           | 3.8  | 22.7 |
| MDA 2  | 17825                        | 17825                        | 464.2  | 1.2 (213/17825) | 0.2 (42/17825)            | 0.9  | 5.6  |
| MDA 3  | 11818                        | 11818                        | 307.8  | 1.1 (128/11818) | 0.1 (15/11818)            | 0.3  | 1.8  |
| MDA 4  | 10072                        | 9080                         | 262.29 | 0.15 (14/9080)  | 0.04 (4/9080)             | 0.1  | 0.6  |
| MDA 5  | 10514                        | 10514                        | 273.8  | 0.06 (6/10514)  | 0.02 (2/10514)            | 0.05 | 0.3  |
| MDA 6  | 7755                         | 4624                         | 201.95 | 0.04 (2/4624)   | 0.02 (1/4624)             | 0.04 | 0.2  |

ATP = annual transmission potential; EIR = entomological inoculation rate; HBR = human biting rate; LF = lymphatic filariasis; MDA = mass drug administration; pos = positive.

SUPPLEMENTAL TABLE 2  
Annual variation of the *Anopheles funestus* LF transmission level over the six MDA rounds

| Years  | Number of mosquito collected | Number of mosquito dissected | HBR   | Infection rate | Infectivity rate (L3 pos) | EIR  | ATP |
|--------|------------------------------|------------------------------|-------|----------------|---------------------------|------|-----|
|        |                              |                              |       | % (positive/N) | % (positive/N)            |      |     |
| Before | 2308                         | 1471                         | 60.1  | 4.9 (72/1471)  | 2 (30/1471)               | 1.2  | 7   |
| MDA 1  | 1796                         | 1796                         | 46.8  | 5.1 (92/1796)  | 2.2 (40/1796)             | 1.03 | 6.2 |
| MDA 2  | 569                          | 569                          | 14    | 1.6 (9/569)    | 0.4 (2/569)               | 0.06 | 0.3 |
| MDA 3  | 1203                         | 1203                         | 31.3  | 1.2 (15/1203)  | 0.1 (1/1203)              | 0.03 | 0.2 |
| MDA 4  | 550                          | 498                          | 14.32 | 0.4 (2/498)    | 0.2 (1/498)               | 0.03 | 0.2 |
| MDA 5  | 90                           | 90                           | 2.3   | 0 (0/90)       | 0 (0/90)                  | 0    | 0   |
| MDA 6  | 77                           | 56                           | 2.01  | 0 (0/56)       | 0 (0/56)                  | 0    | 0   |

ATP = annual transmission potential; EIR = entomological inoculation rate; HBR = human biting rate (monthly); LF = lymphatic filariasis; MDA = mass drug administration; pos = positive.
